# Supplementary material
Source: publisher figshare collection journal article supplement (https://springernature.figshare.com/ndownloader/files/14640167)
Supplement: Supplementary file 1 [file 14640167]

%% Intron size distribution in Danionella translucida 
%  Code for the manuscript: "Draft hybrid genome assembly and annotation of Danionella translucida,
%  a transparent fish with the smallest vertebrate brain." biorxiv, 
%  2019.01.09 MK
% For plotting, dscatter is needed: 
% https://de.mathworks.com/matlabcentral/fileexchange/8430-flow-cytometry-data-reader-and-visualization?focused=6779476&tab=function

%% Import the DR-DT orthologous genes 
% DR = Danio rerio 
% DT = Danionella translucida

%% Create an ortholog lookup table from the CRB-Blast dataset
% File orthologs_nocopies.txt contains orthologue pairs after removing hits
% with duplicates in DR
opts = detectImportOptions('orthologs_nocopies.txt','NumHeaderLines',0, ...
                           'Delimiter', {'    ', '\t', ' '});
ortho_table = readtable('orthologs_nocopies.txt', opts);
% Create hashmap of orthologs (DT,ZF)
orthologs = containers.Map(ortho_table.DT_PROT, ortho_table.DR_PROT);

%% Load all exons for both fish
dr_exons = GFFAnnotation('dr.ensembl.exome.gff3');
dt_exons = GFFAnnotation('dt.exome.gff3');

%% Now we have an Ensembl table DT transcript <-> DR protein <-> DR exon
% Before we can calculate everything we need additional table to convert DR
% protein name into the transcript name. If the exon belongs to the same
% protein it will then be counted into the intron lengths for the same
% protein. We use BioMart export for this convertion (following table)

% Load the map 
opts = detectImportOptions('ensembl_p_e_t.txt', ...
                           'NumHeaderLines',0, ... 
                           'Delimiter', {'\t', '	'});
dr_p_e_t_table = readtable('ensembl_p_e_t.txt', opts);
% Create hashmaps
dr_e_p = containers.Map(dr_p_e_t_table.EXON_ID, dr_p_e_t_table.PROTEIN_ID);
dr_e_t = containers.Map(dr_p_e_t_table.EXON_ID, dr_p_e_t_table.TRANSCRIPT_ID);
dr_p_t = containers.Map(dr_p_e_t_table.PROTEIN_ID, dr_p_e_t_table.TRANSCRIPT_ID);


%% Look in the DR gff3 and create intron map for each protein
% Create a hashmap for all those introns

% These will be keys and values 
dr_introns_names   = cell(0);
dr_introns_lengths = cell(0);

i_exon = 1;

while i_exon <= 100%length(dr_exons.Attributes)
    
    temp = strsplit(dr_exons.Attributes{i_exon}, {'Name=', ';'});
    dr_exon_name = temp{2};
    
    current_transcript_introns = [];
    
    i_fwd = 1;
    
    if dr_e_t.isKey(dr_exon_name) && ~isempty(dr_e_t(dr_exon_name))
        dr_introns_names{end+1} = dr_e_t(dr_exon_name);
        temp = strsplit(dr_exons.Attributes{i_exon+i_fwd}, {'Name=', ';'});
        next_exon_name = temp{2};
        while strcmp(dr_e_t(dr_exon_name), dr_e_t(next_exon_name))
            current_transcript_introns(end+1) = ...
                double(abs(dr_exons.Start(i_exon + i_fwd) - dr_exons.Stop(i_exon + i_fwd - 1)));
            i_fwd = i_fwd + 1;
            temp = strsplit(dr_exons.Attributes{i_exon+i_fwd},  {'Name=', ';'});
            next_exon_name = temp{2};
        end
        if ~isempty(current_transcript_introns)
            dr_introns_lengths{end+1} = current_transcript_introns;
        else 
            dr_introns_lengths{end+1} = 0;
        end
    end
    
    i_exon = i_exon + i_fwd; 
end

% Now make a hashmap out of this
dr_introns_names(end) = [];
dr_intron_map = containers.Map(dr_introns_names, dr_introns_lengths);

%% Extract DR intron lengths from the resulting database
dr_introns = [];
for i = 1:length(dr_introns_lengths)
    dr_introns = [ dr_introns, dr_introns_lengths{i}]; 
end

%% Read DT name list 
dt_names = readtable('dt.transcript.names.txt');

%% !! Convert names in the DT intron table and create intron map, only for orthologs
% while at it, extract the orthologs from the ready-made DR database now 
% Cell only for DT
dt_introns_names    = {};
dt_introns_lengths  = {};


n_tr = length(dt_names.ID);
for i_tr = 1:n_tr
    exons = find(contains(dt_exons.Attributes, dt_names.ID(i_tr)));
    
    dt_introns_names(end+1) = dt_names.ID(i_tr);
    current_introns = []; 
    for i_introns = 1:(length(exons)-1)
        current_introns{end+1} = abs(dt_exons.Start(exons(i_introns+1))...
                                   - dt_exons.Stop(exons(i_introns)));
    end
    dt_introns_lengths{end+1} = current_introns;
end

dt_intron_map = containers.Map(dt_introns_names, dt_introns_lengths);
%% Extract DT intron lengths from the resulting database
dt_introns = [];
for i = 1:length(dt_introns_lengths)
    dt_introns = [ dt_introns, double(string(dt_introns_lengths{i}))]; 
end

%% Plot the resulting data
[dt_is, dt_i] = histcounts(double(introns),5000);
[dr_is, dr_i] = histcounts(double(dr_introns),5000);
plot(dr_i(1:end-1),dr_is/trapz(dr_i(1:end-1),dr_is))
hold on
plot(dt_i(1:end-1),dt_is/trapz(dt_i(1:end-1),dt_is))

%% Now do the ortholog comparison 

% Map transcripts -> proteins, previously remove versions 
empty = 0;
avgs_dr = [];
sums_dr = [];
sums_dt = [];
for i = 1:length(ortho_table.DT_PROT)
    dt_ortho_p_name = ortho_table.DT_PROT{i}; 
    dr_ortho_p_name = ortho_table.DR_PROT{i};

    % Find the transcript -> protein in the database 
    dr_ortho_t_name = dr_p_t(dr_ortho_p_name);
    % Cut off the version 
    dr_ortho_t_name = strsplit(dr_ortho_t_name(1:end-2), '.');
    dr_ortho_t_name = dr_ortho_t_name{1};
    
    % Find associated intron lengths 
    dt_ortho_introns = dt_introns_lengths(find(strcmp(...
                       [dt_introns_names], dt_ortho_p_name)));
    dr_ortho_introns = dr_introns_lengths(find(strcmp(...
                       [dr_introns_names], dr_ortho_t_name)));
    if  ~isempty(dt_ortho_introns{:}) 
        sums_dt(end+1) = sum(double(string(dt_ortho_introns{:})));
    end
end 

%% Plot 
dscatter(avgs_dt'/1000, avgs_dr'/1000, 'BINS', [500 500])
axis square equal; colormap parula; hold on
axis([0 50 0 50])

% Do a linear fit with scaling
[p, S] = polyfit(avgs_dt'/1000,avgs_dr'/1000,1);

% Get a confidence interval 
xfit = linspace(0, 250, length(avgs_dt));
[y_fit,delta] = polyval(p,xfit,S);
plot(xfit, xfit .* p(1) + p(2))
plot(xfit, xfit .* p(1) + p(2) + 2*delta,'m--', xfit, xfit .* p(1) + p(2) - 2*delta, 'm--')

% No intercept 
dlm = fitlm(avgs_dt'/1000, avgs_dr'/1000, 1, 'Intercept',false);
plot(xfit, xfit * dlm.Coefficients{1,1})
